# Supplementary material for: Surface topography of nanoplastics modulates their internalization and toxicity in liver cells
Source: Royal Society of Chemistry journal article supplement (doi:10.1039/d3en00347g), 2023-01-01
Supplement: d3en00347g1.pdf [file d3en00347g1.pdf]

## Supporting information

### Surface Topography of Nanoplastics Modulates Their Internalization and Toxicity in Liver Cells

Neng Yan<sup>1</sup>, Yuhuai Wang<sup>1</sup>, Tin Yan Wong<sup>2</sup>, Yubing Hu<sup>3</sup>, Huo Xu<sup>4</sup>, Parodi Alessandro<sup>5</sup>,  
Ke Pan<sup>4</sup>, Jingjing Liu,<sup>6</sup> Henry Lam<sup>2</sup>, Ben Zhong Tang<sup>7\*</sup>, Jianbo Shi<sup>1\*</sup>

<sup>1</sup>*State Environmental Protection Key Laboratory of Source Apportionment and Control of Aquatic Pollution, School of Environmental Studies, China University of Geosciences, Wuhan 430074, China*

<sup>2</sup>*Department of Chemical and Biological Engineering, The Hong Kong University of Science and Technology, Kowloon, Hong Kong 999077, China*

<sup>3</sup>*Department of Chemical Engineering, Imperial College London, London SW7 2BU, U.K*

<sup>4</sup>*SZU-HKUST Joint PhD Program in Marine Environmental Science, Shenzhen University, Shenzhen 518060, Guangdong Province, China*

<sup>5</sup>*Scientific Center for Translation Medicine, Sirius University of Science and Technology, 354340 Sochi, Russia*

<sup>6</sup>*Department of Biomedical Engineering, Nanjing University of Aeronautics and Astronautics, Nanjing 210016, China*

<sup>7</sup>*Shenzhen Institute of Aggregate Science and Technology, School of Science and Engineering, The Chinese University of Hong Kong, Shenzhen, Guangdong 518172, China*

\*Corresponding author, Email: [tangbenz@cuhk.edu.cn](mailto:tangbenz@cuhk.edu.cn); [jbshi@rcees.ac.cn](mailto:jbshi@rcees.ac.cn);

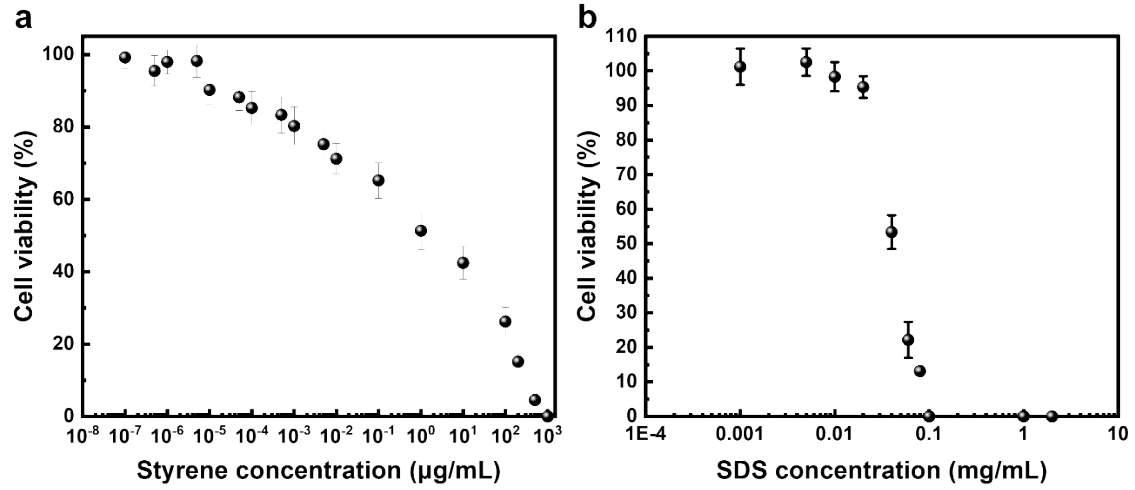

Figure S1. 24 h cytotoxicity test of styrene and SDS towards the L02 cells.

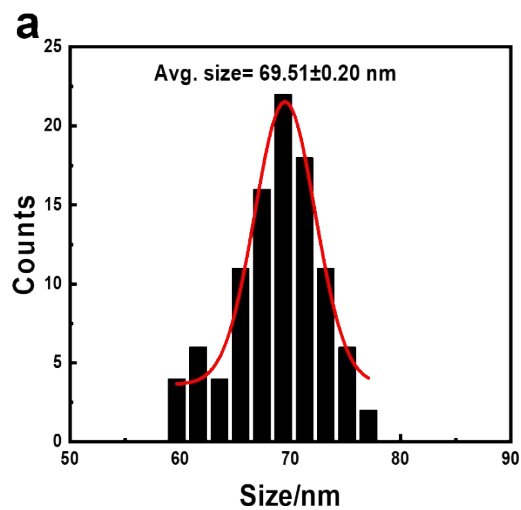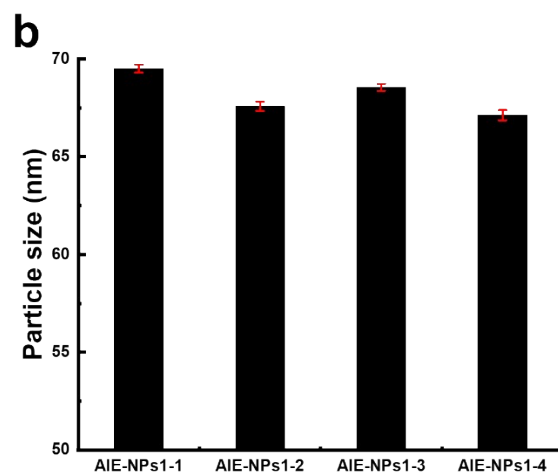

Figure S2. Size distribution of the synthesized AIE-NPs1.

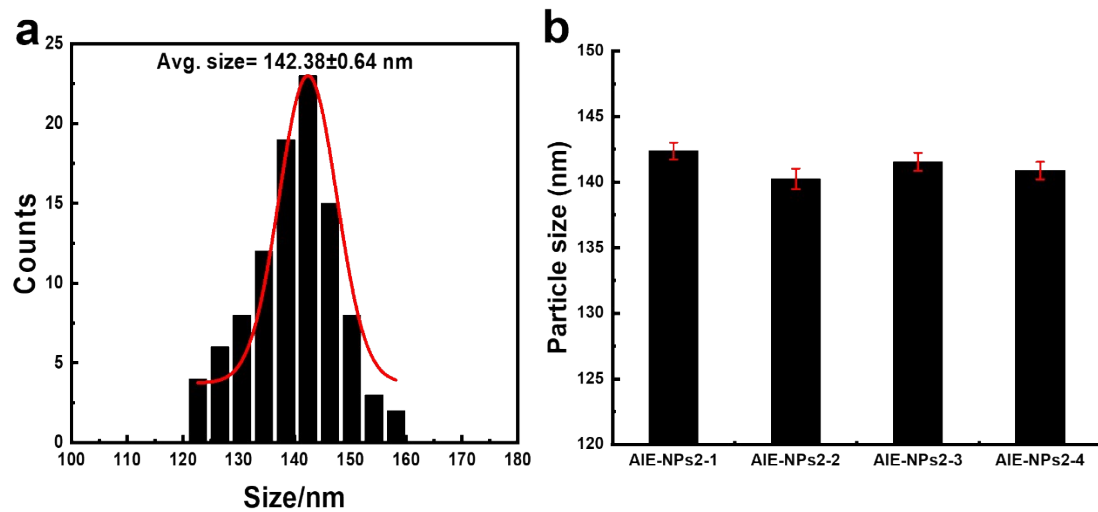

Figure S3. Size distribution of the synthesized AIE-NPs2.

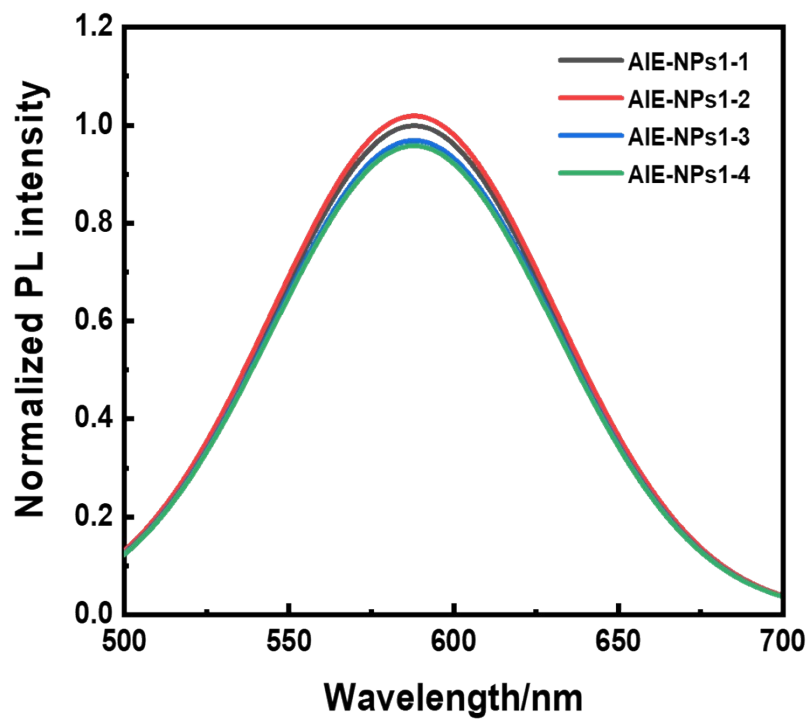

Figure S4. Normalized PL intensity of 10 mg/L of AIE-NPs1.

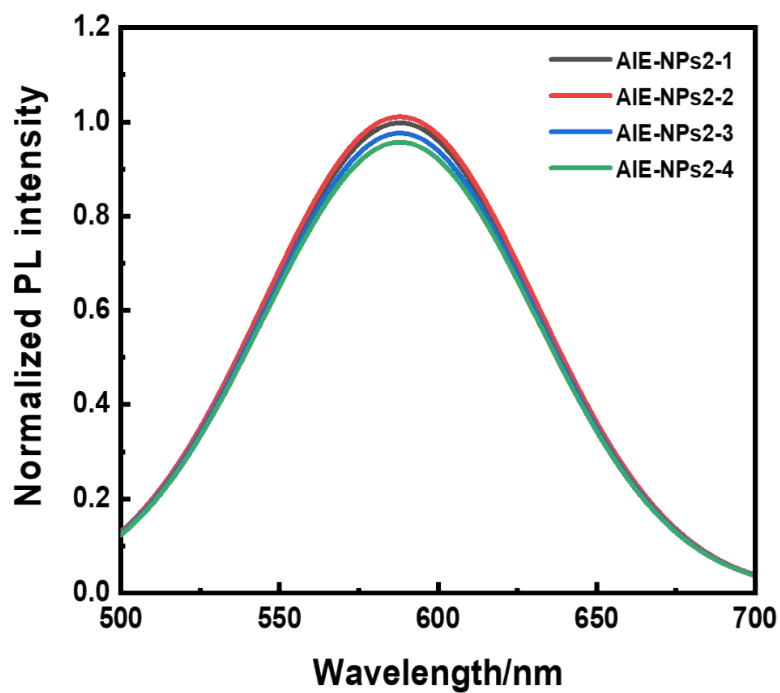

Figure S5. Normalized PL intensity of 10 mg/L of AIE-NPs2.

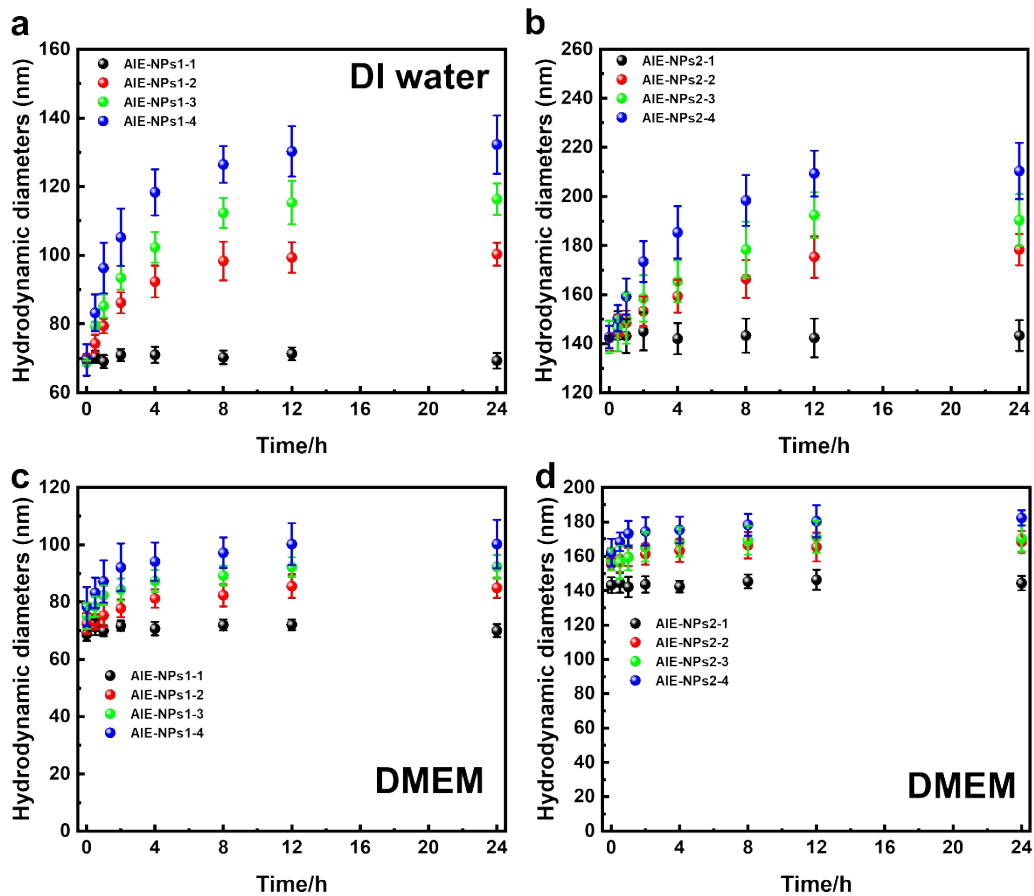

Figure S6. Aggregation kinetics of 10 mg/L of AIE-NPs within 24 h exposures. The hydrodynamic diameter changes of AIE-NPs1 (a) and AIE-NPs2 (b) in the DI water and the hydrodynamic diameter changes of AIE-NPs1 (c) and AIE-NPs2 (d) in the DMEM medium, respectively.

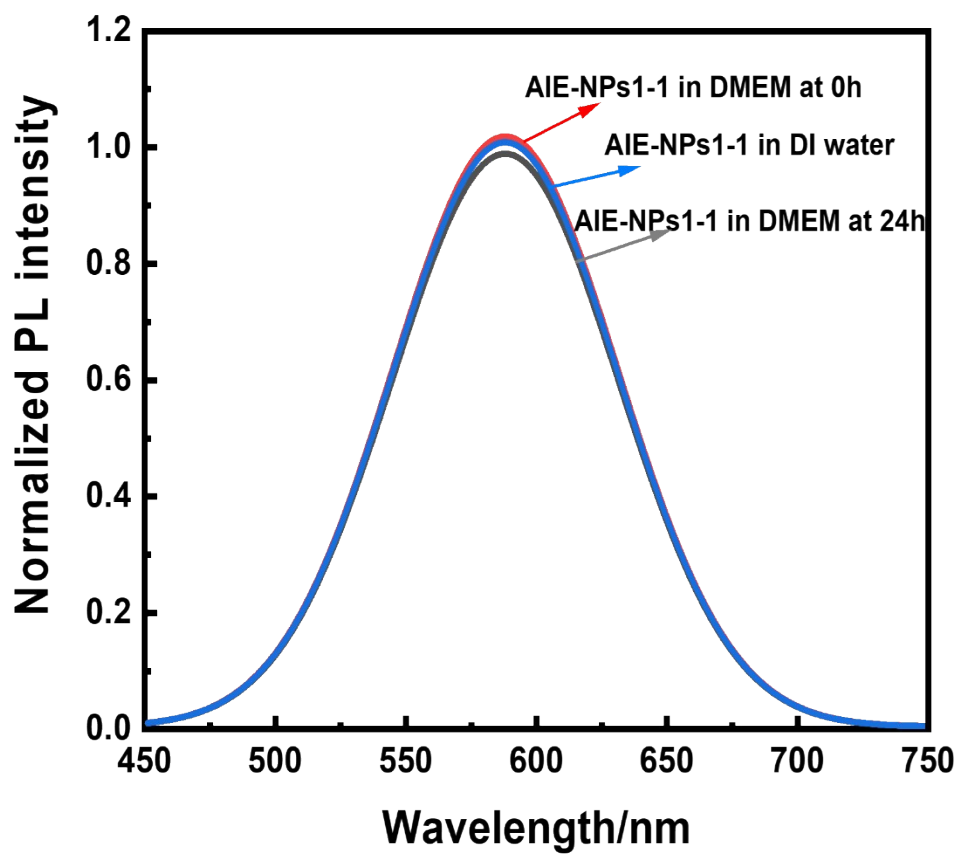

Figure S7. Evaluating the photostability of 10 mg/L of the AIE-NPs1-1 in the DMEM medium after 24 h exposures.



Table S1. The size and zeta potential of the synthesized AIE-NPs in cell culture medium.

| Nanoplastics | Size distribution | Zeta potential |
|--------------|-------------------|----------------|
| AIE-NPs1-1   | 68.75±2.23        | -32.58±1.27    |
| AIE-NPs1-2   | 72.55±3.58        | -33.25±2.03    |
| AIE-NPs1-3   | 75.23±4.55        | -30.29±3.01    |
| AIE-NPs1-4   | 78.44±6.77        | -36.25±2.88    |
| AIE-NPs2-1   | 143.23±4.56       | -34.22±2.53    |
| AIE-NPs2-2   | 155.29±3.58       | -35.52±2.14    |
| AIE-NPs2-3   | 158.43±5.68       | -34.95±2.57    |
| AIE-NPs2-4   | 162.23±7.98       | -36.83±1.95    |

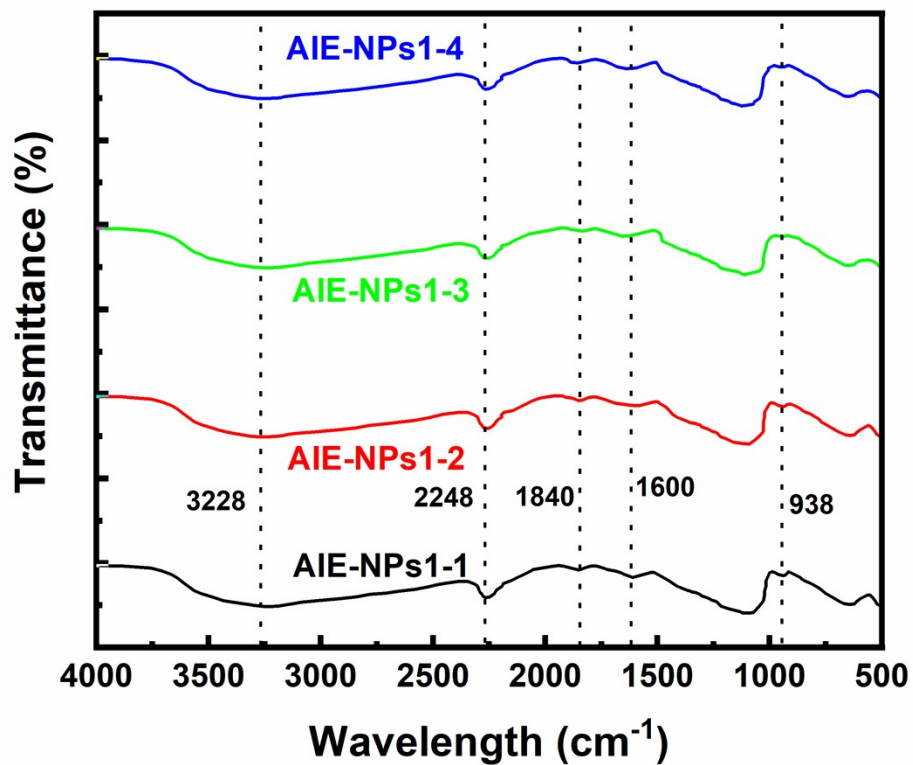

Figure S8. Infrared spectra of AIE-NPs1 after HDS treatment for different durations.

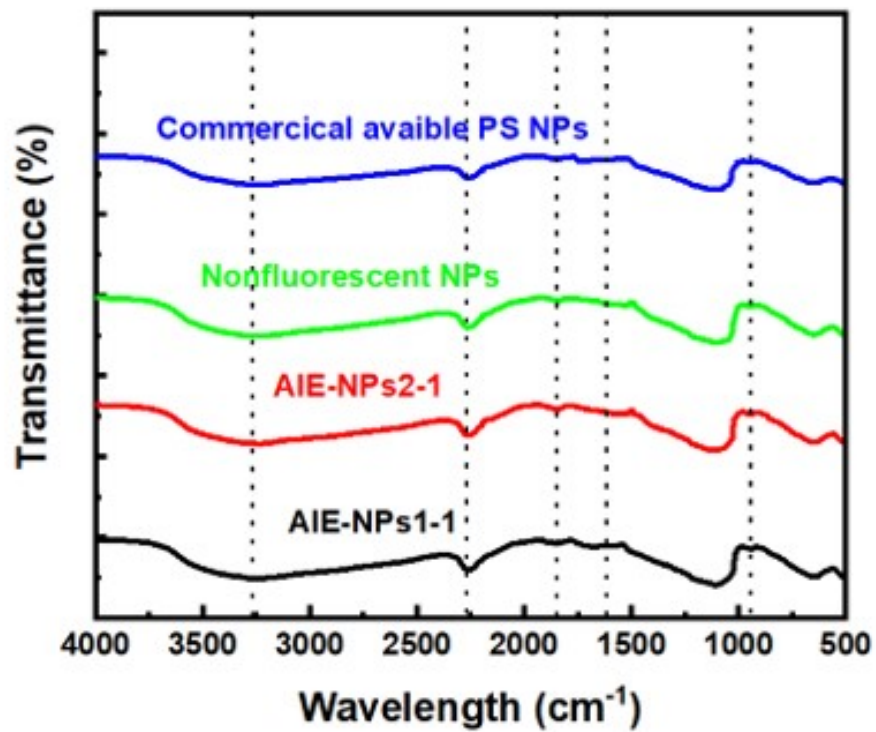

Figure S9. FTIR spectra of PS NPs, the synthesized nonfluorescent PS NPs, synthesized AIE-NPs1-1 and AIE-NPs2-1.

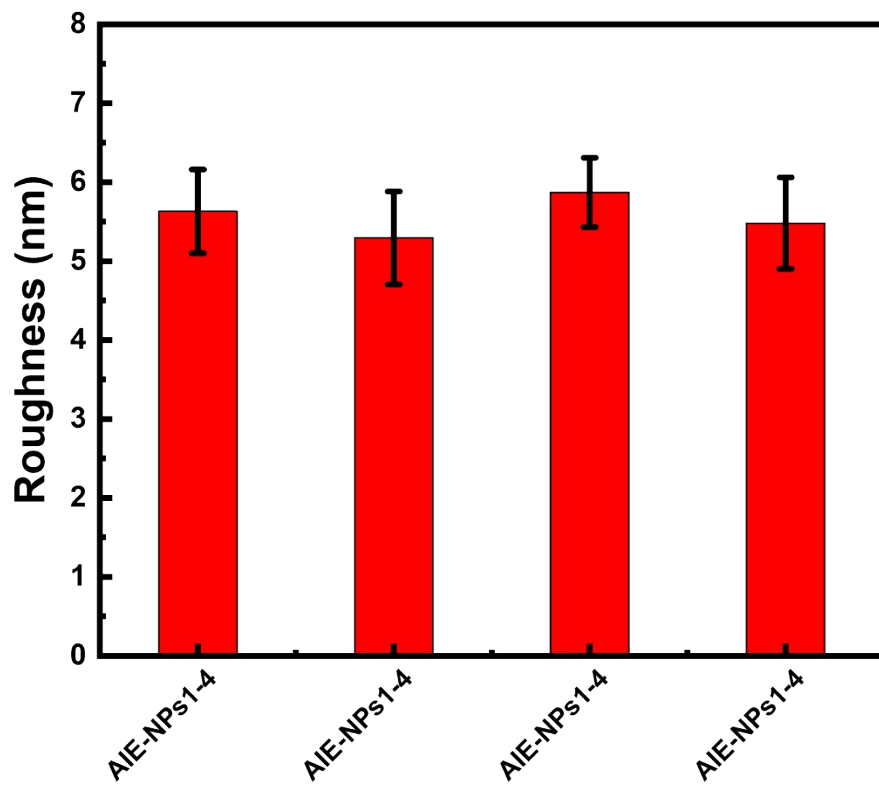

Figure S10. The surface roughness measurement of the obtained 10 mg/L of AIE-NPs1-4 (by treating the AIE-NPs1 in the HDS environment at different dates). There were three replicates in each treatment. No significant difference has been identified in four treatments using one-way ANOVA ( $P=0.62$ ,  $>0.5$ , no significant difference).

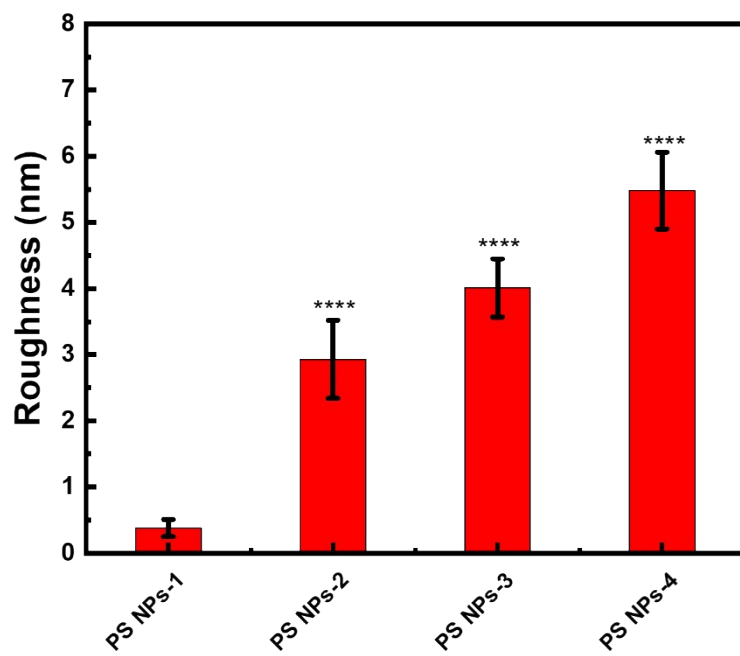

Figure S11. Surface roughness measurement of commercially available 70 nm sized PS NPs that are being exposed to HDS environment for different durations (as AIE-NPs1).

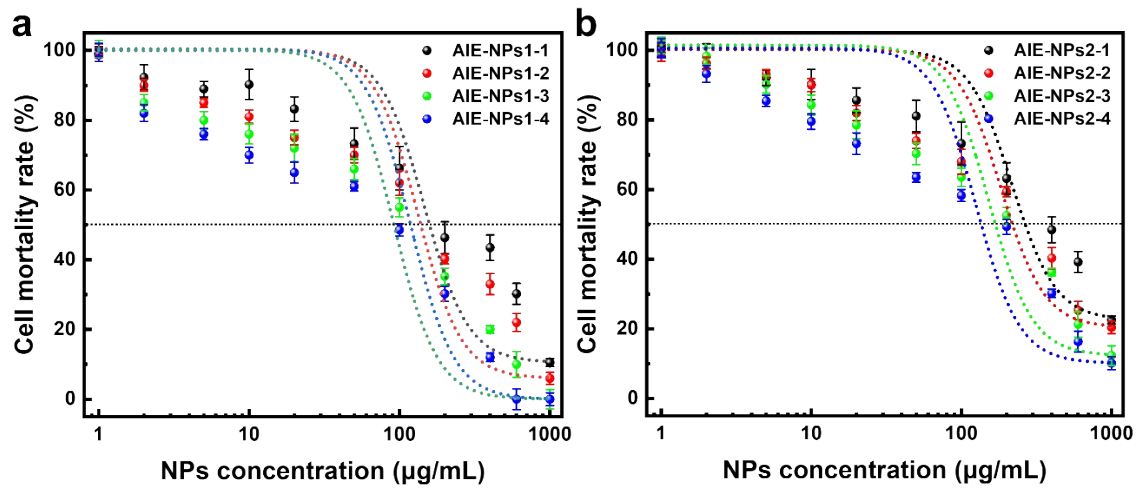

Figure S12. Cytotoxicity of AIE-NPs1 (a) and AIE-NPs2 (b) after 24 h exposure.

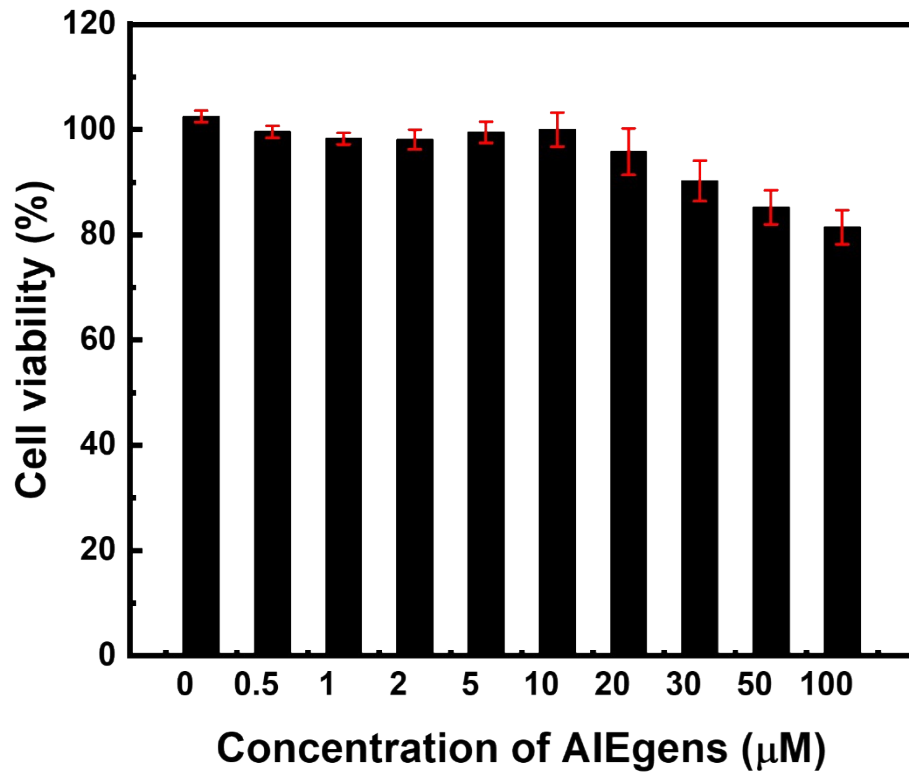

Figure S13. 24 h cytotoxicity test of AIEgens towards the L02 cells.

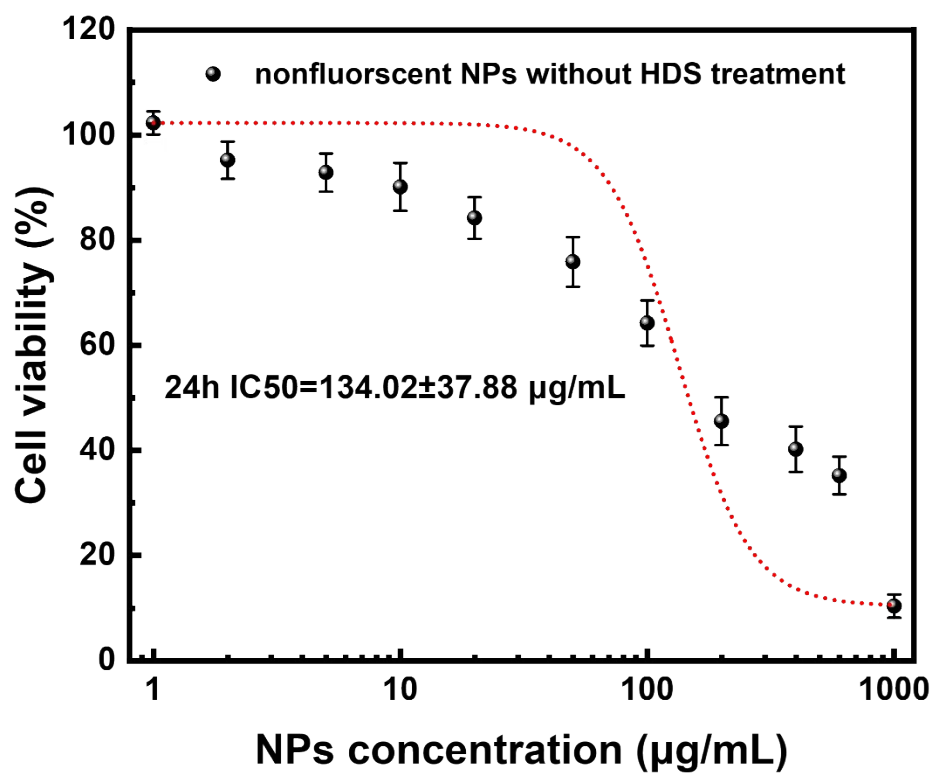

Figure S14. Cytotoxicity of the synthesized nonfluorescent nanoplastics (the same synthesis processes as the AIE-NPs1 but without HDS treatment) after 24 h exposure. The measured 24h IC<sub>50</sub> was 134.02 ± 37.88 mg/L.



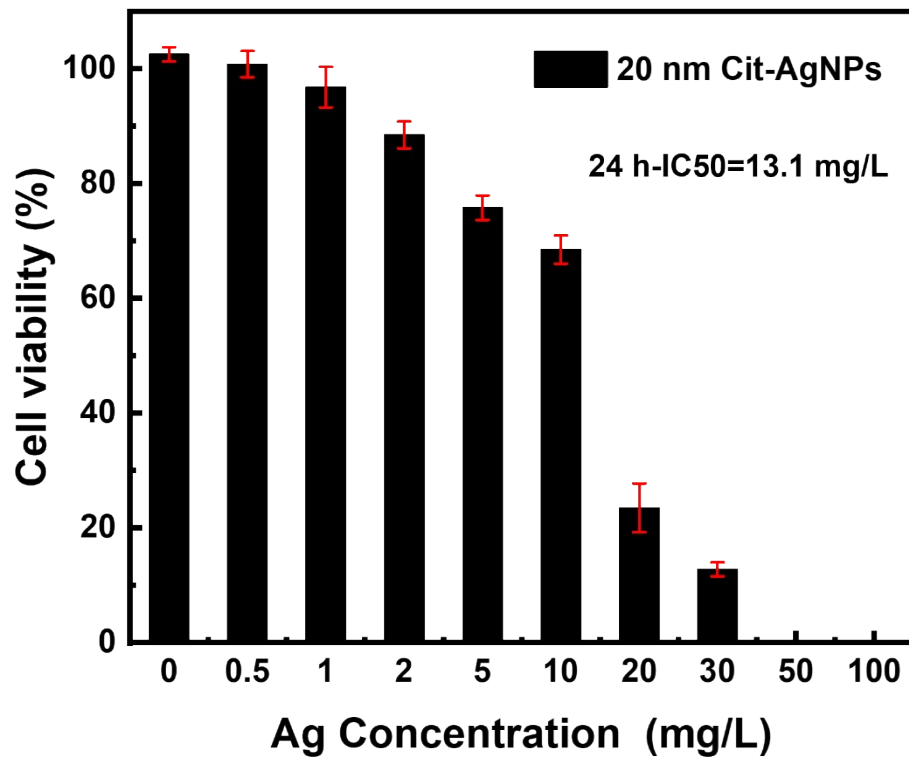

Figure S15. 24 h cytotoxicity test of 20 nm citrate coated AgNPs towards the L02 cells.

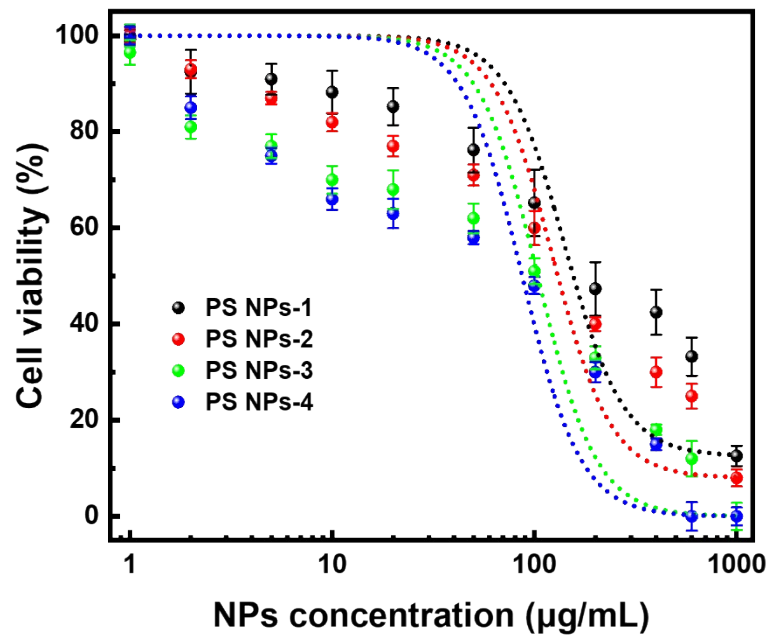

Figure S16. Cytotoxicity of HDS treated commercially available 70 nm sized PS NPs after 24 h exposure.

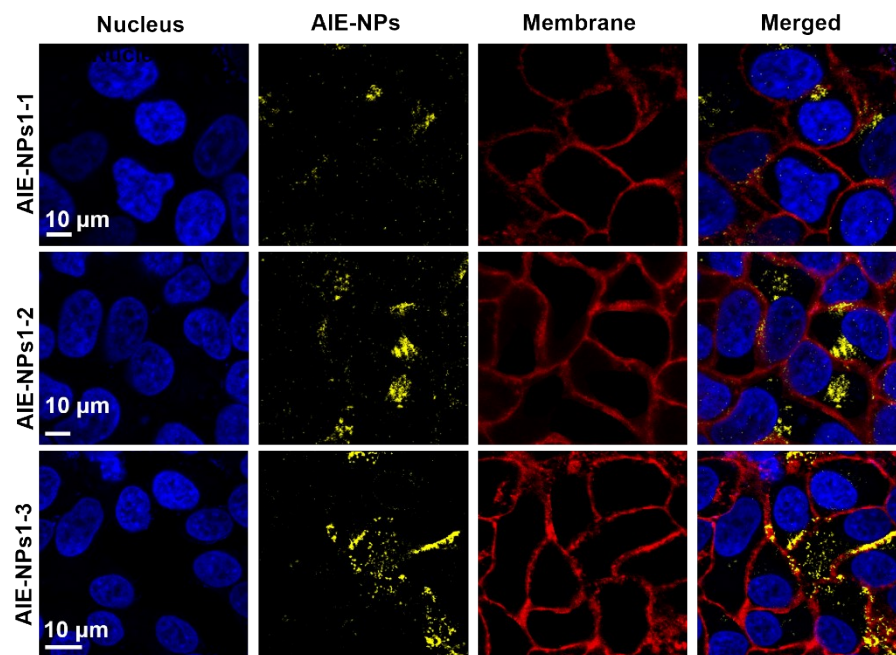

Figure S17. The intracellular patterns of AIE-NPs1-1 to AIE-NPs1-3.

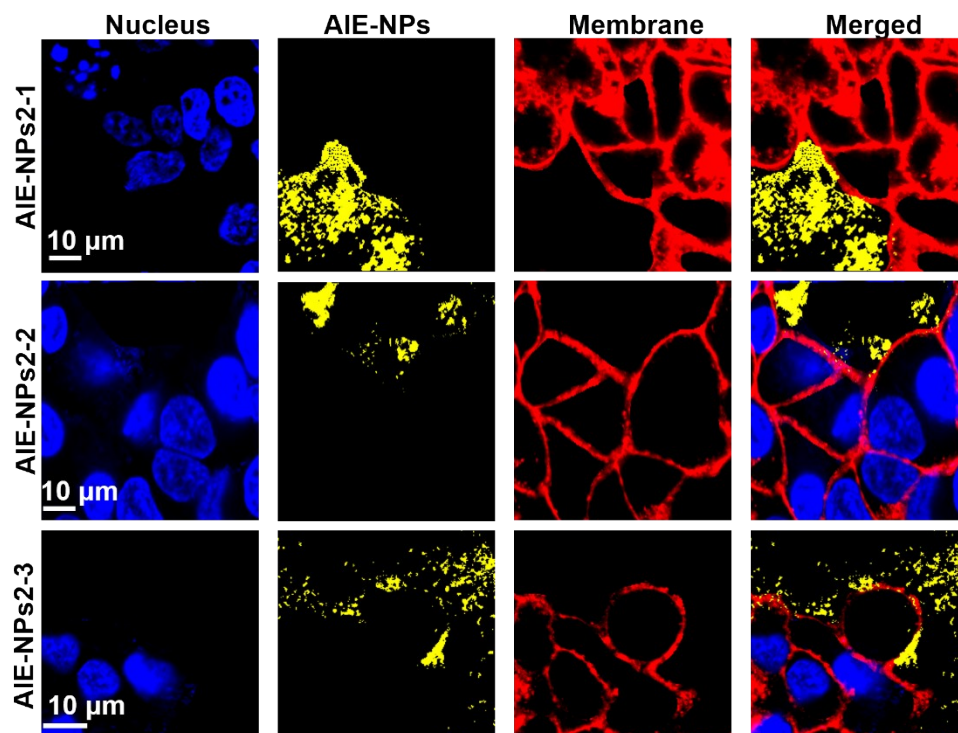

Figure S18. The intracellular patterns of AIE-NPs2-1 to AIE-NPs2-3.

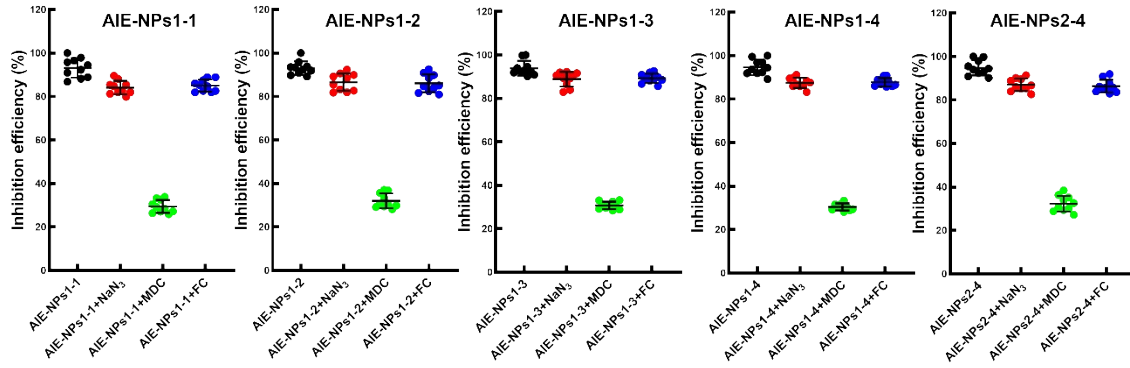

Figure S19. Impact of different endocytosis inhibitors (NaN<sub>3</sub>, MDC and FC) on the cellular accumulation of AIE-NPs1-1 to AIE-NPs 1-4 and AIE-NPs2-4. Human hepatocytes were first incubated with sodium azide (NaN<sub>3</sub>, 0.25mM), monodansylcadaverine (MDC, 0.2 mM) or filipin complex (FC, 0.07 mM) before the exposure of 10 mg/L AIE-NPs.

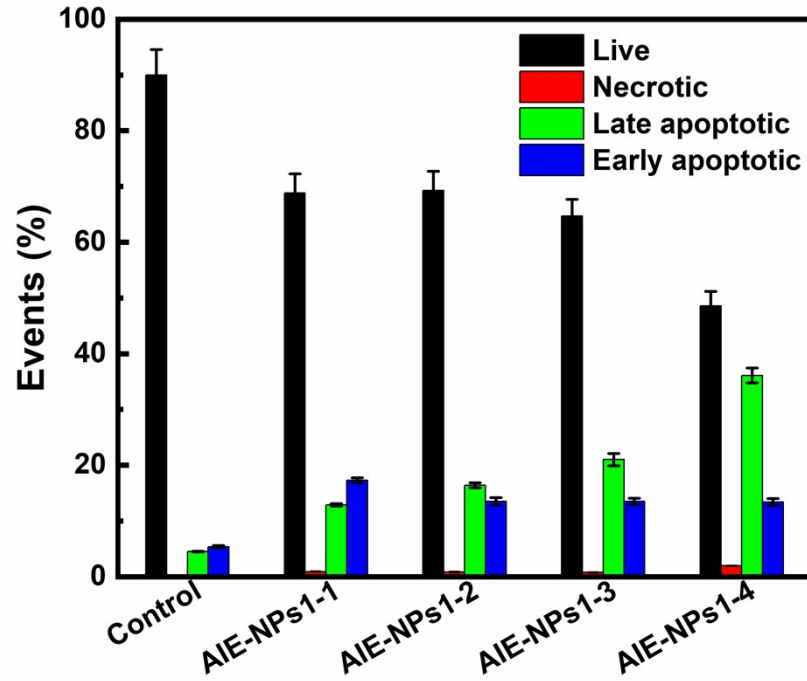

Figure S20. The percentage of cells in live, necrotic, early apoptosis and late apoptosis after the cell being exposed to the AIE-NPs1 or without any AIE-NPs exposure.
